# Supplementary material for: 3D printing of cell-laden electroconductive bioinks for tissue engineering applications
Source: Royal Society of Chemistry journal article supplement (doi:10.1039/d0tb00627k), 2020-01-01
Supplement: d0tb00627k1.pdf [file d0tb00627k1.pdf]

**Supporting information:**

**3D Printing of Cell-Laden Electroconductive Bioink for Tissue Engineering**

**Application**

Hadi Rastin, Bingyang Zhang, Jingxiu Bi, Kamrul Hasan, Tran Tung, Dusan Losic\*

School of Chemical Engineering & Advanced Materials, The University of Adelaide,  
Adelaide, SA 5005, Australia

Corresponding author: Prof Dusan Losic

E-mail address: [dusan.losic@adelaide.edu.au](mailto:dusan.losic@adelaide.edu.au)

## 1. Formulation of the bioink

**Table S1** summarized the prepared formulation of MC/ $\kappa$ CA/PEDOT:PSS inks in total 4 ml solution.

**Table S1:** Formulation of prepared MC/ $\kappa$ CA/PEDOT:PSS inks in total 4 ml solution

| Sample code                       | MC(mg) | $\kappa$ CA(mg) | PEDOT:PSS( $\mu$ l) |
|-----------------------------------|--------|-----------------|---------------------|
| MC-4/ $\kappa$ CA-1               | 160    | 40              | 0                   |
| MC-6/ $\kappa$ CA-1               | 240    | 40              | 0                   |
| MC-8/ $\kappa$ CA-1               | 320    | 40              | 0                   |
| MC-4/ $\kappa$ CA-1.5             | 160    | 60              | 0                   |
| MC-6/ $\kappa$ CA-1.5             | 240    | 60              | 0                   |
| MC-8/ $\kappa$ CA-1.5             | 320    | 60              | 0                   |
| MC-8/ $\kappa$ CA-1/PEDOT:PSS-0.1 | 320    | 60              | 307                 |
| MC-8/ $\kappa$ CA-1/PEDOT:PSS-0.3 | 320    | 60              | 923                 |

## 2. Linear viscoelastic region of MC/ $\kappa$ CA hydrogel

**Figure S1** presents the evolution of the  $G'$  value over frequency range 0.01-100% to determine the linear viscoelastic regions. As seen, the  $G'$  value remain unchanged up to 1% strain followed by continuous fall. Accordingly, all oscillatory rheological experiments were conducted in 1 % stain.

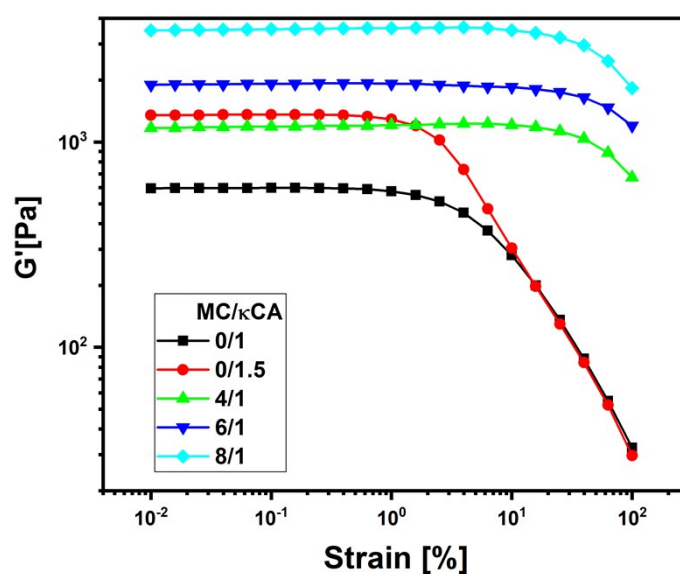

**Figure S1:** Change in the  $G'$  value over strain sweep from 0.01 % to 100 %

### 3. Rheological measurements of MC/ $\kappa$ CA-1.5 in extrusion stage

Figure S2 provide the evolution of the  $G'$  and  $G''$  over shear stress sweep and flow curve of MC/ $\kappa$ CA with 1.5 wt.%  $\kappa$ CA component. As seen, an increase in the MC concentration cause yield stress shift toward higher values. In addition, flow curves jump to higher values upon increase in the MC content.

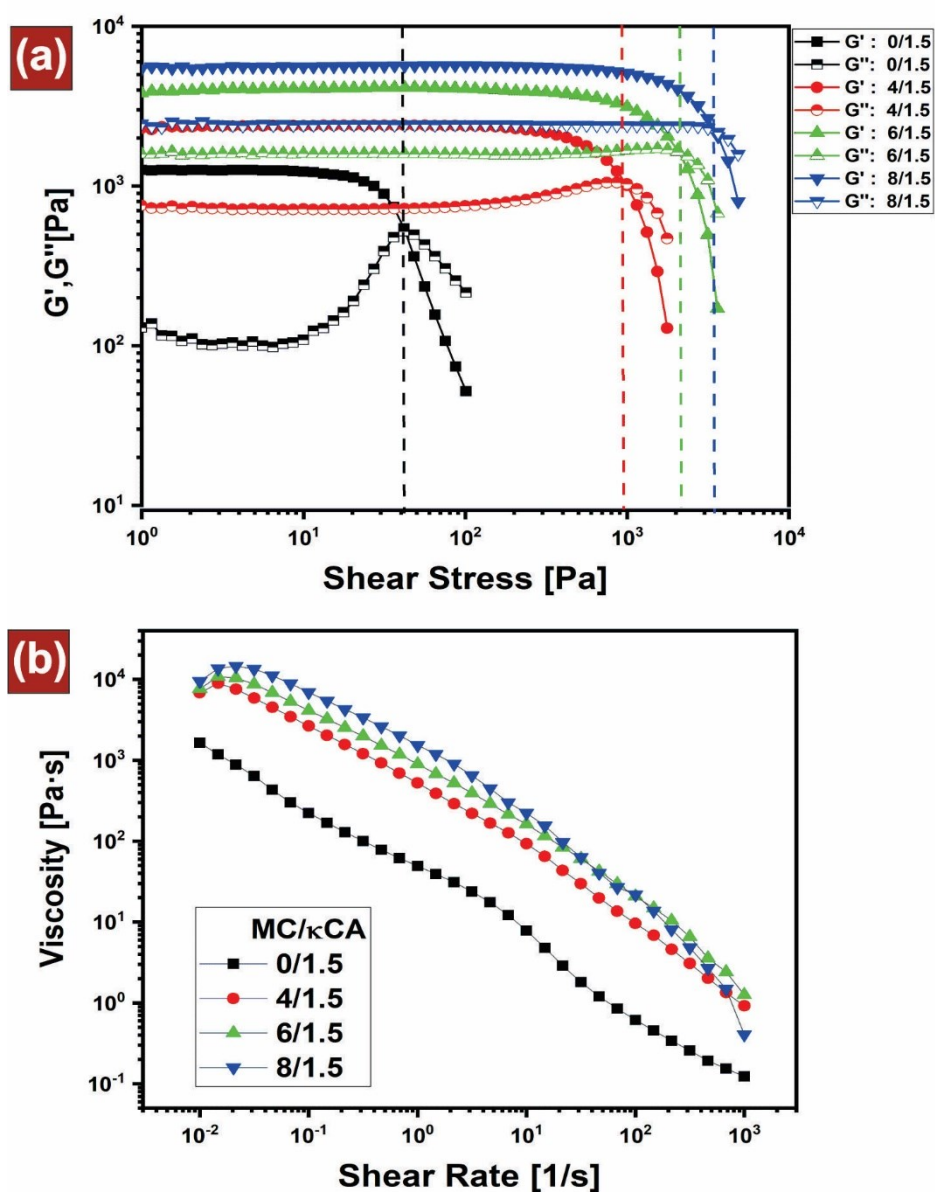

Figure S2. Rheological characterization of MC/ $\kappa$ CA with 1.5 wt.%  $\kappa$ CA in extrusion stage.

(a) yield stress determination (b) flow curve

#### 4. Rheological measurements of MC/ $\kappa$ CA-1.5 in recovery stage

**Figure S3** provides the recoverability of MC/ $\kappa$ CA hydrogel with 1.5 wt.%  $\kappa$ CA component by applying alternating low and high strain and shear rate. As seen, almost full recovery occurs for all prepared MC/ $\kappa$ CA-1.5 hydrogels after removing of high strain (**Figure S3 a**). In addition, viscosity of MC/ $\kappa$ CA-1.5 hydrogels declined significantly immediately after application of high shear rate and then recovered in a short time (**Figure S3 b**).

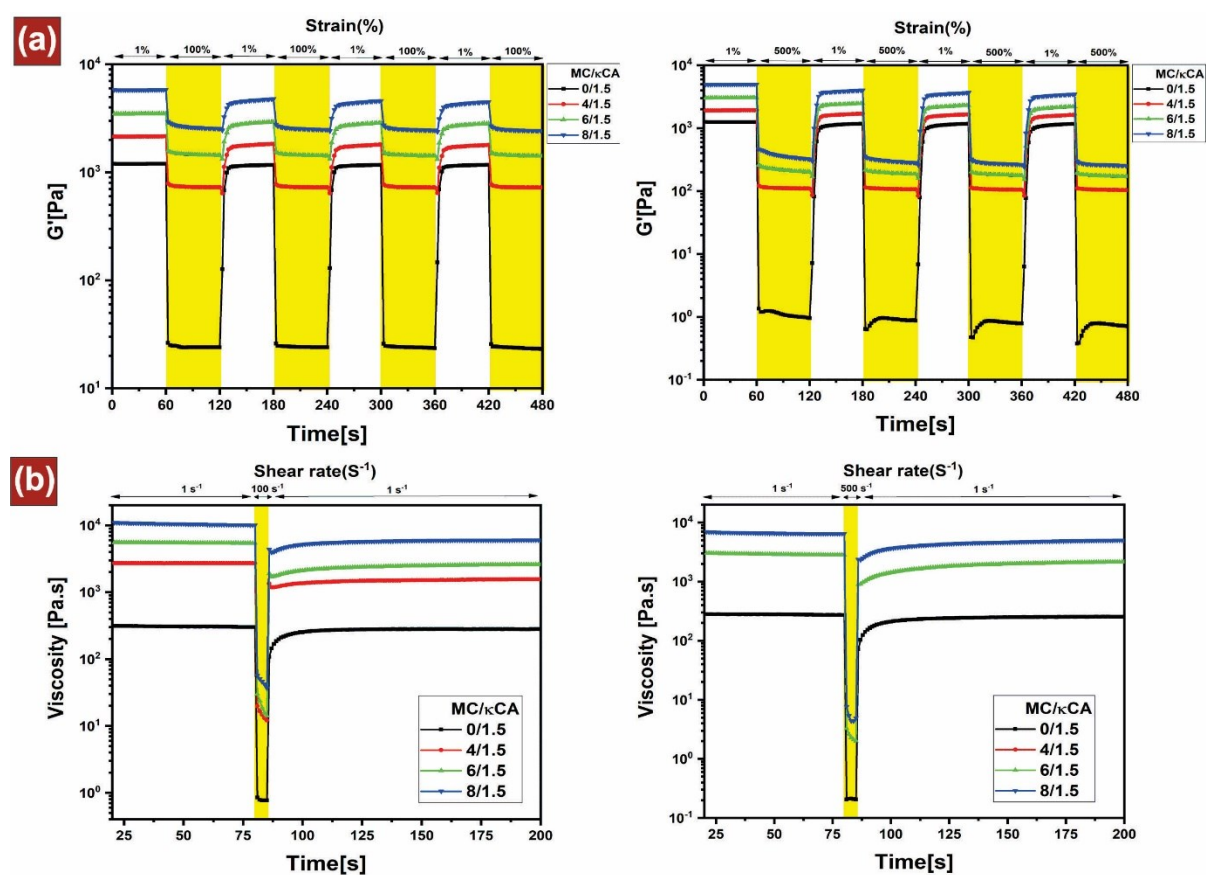

**Figure S3.** Rheological characterization of MC/ $\kappa$ CA with 1.5 wt.%  $\kappa$ CA in recovery stage. (a) change of  $G'$  upon applying repetitive low (1%) and high strains (100% left panel, 500 % right panel) and (b) Variation of viscosity over low ( $1 \text{ s}^{-1}$ ) and high shear rate ( $100 \text{ s}^{-1}$  left panel,  $500 \text{ s}^{-1}$  right panel)

#### 5. Rheological measurements of MC/ $\kappa$ CA-1.5 in shape retention stage

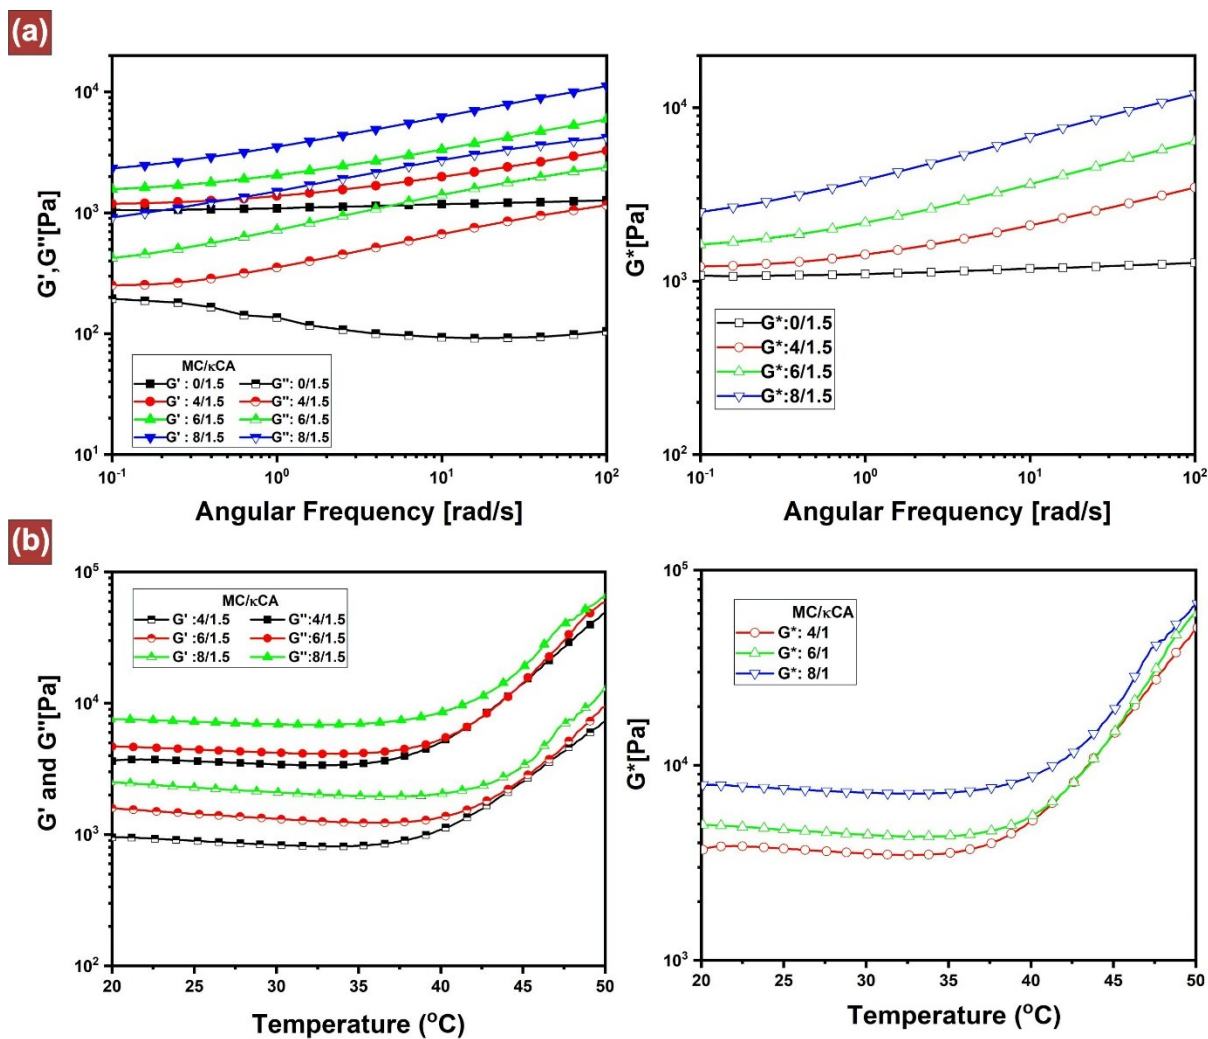

**Figure S4.** Rheological characterization of MC/ $\kappa$ CA with 1.5 wt.%  $\kappa$ CA in shape retention stage. Change of  $G'$ ,  $G''$ , and  $G^*$  over (a) frequency sweep from 0.1 Hz to 100 Hz, and (b) temperature ramp from 20 °C to 50 °C,

## 6. Electrical conductivity of the printed and bulk hydrogel

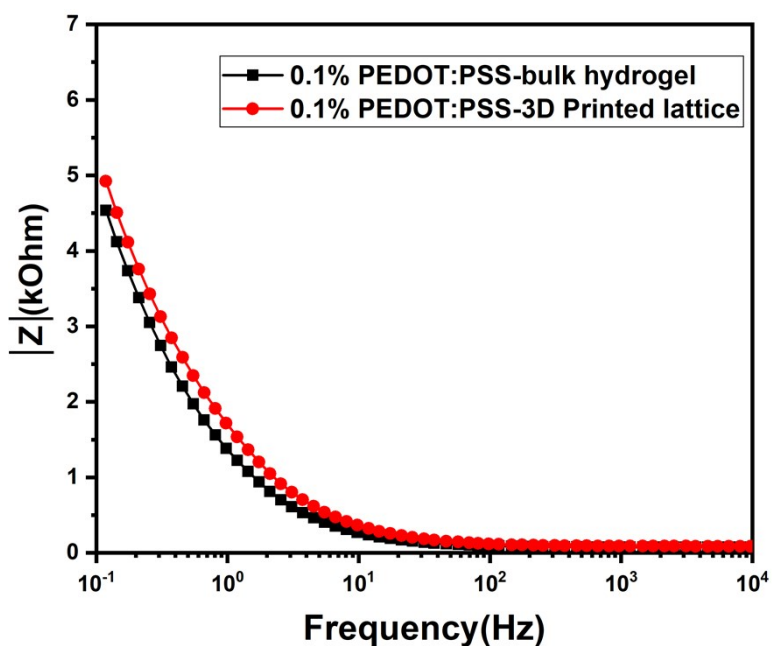

**Figure S5:** Electrical conductivity of the printed and bulk hydrogel containing 0.1 wt.% PEDOT:PSS conductive polymer

### 7. Collapse of 3D printed structures by MC-8 hydrogel

**Figure S6** presents the hexagonal and circular shapes printed by MC-8 hydrogel. As seen, these structures collapsed after few layer of deposition due to the low shape-retention behaviour.

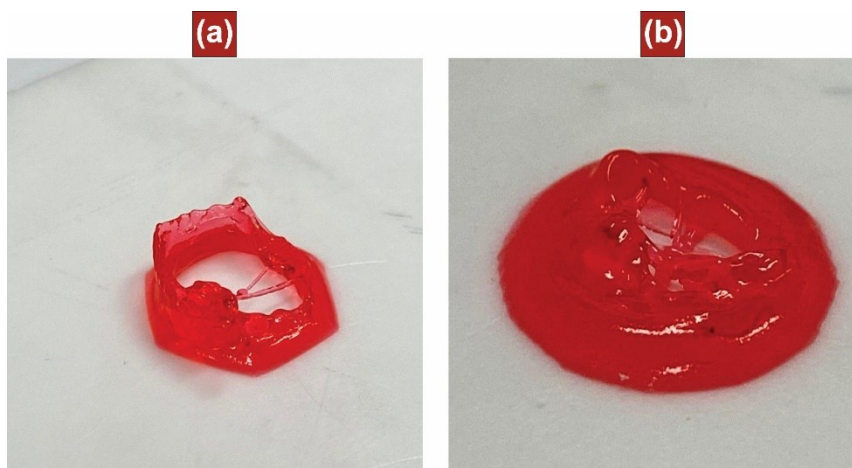

**Figure S6.** Pictures of 3D printed constructs with MC-8, which collapsed after few layers of deposition. (a) Hexagonal shape, (b) circular shape

## 8. Swelling of the 3D printed lattice construct

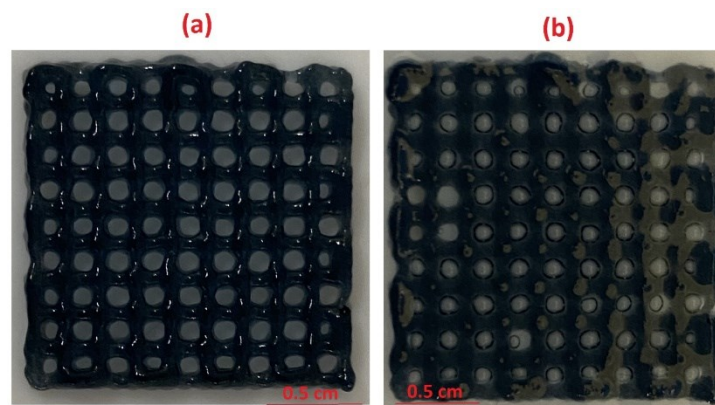

Figure S7: Pictures of 3D printed lattice construct by MC-8/ $\kappa$ CA-1/PEDOT:PSS-0.1 ink (a) before and (b) after swelling
